# Supplementary material for: Production of Indigo by Recombinant Escherichia coli with Expression of Monooxygenase, Tryptophanase, and Molecular Chaperone
Source: MDPI journal article supplement (doi:10.3390/foods11142117), 2022-07-16
Supplement: s1 [file s1]

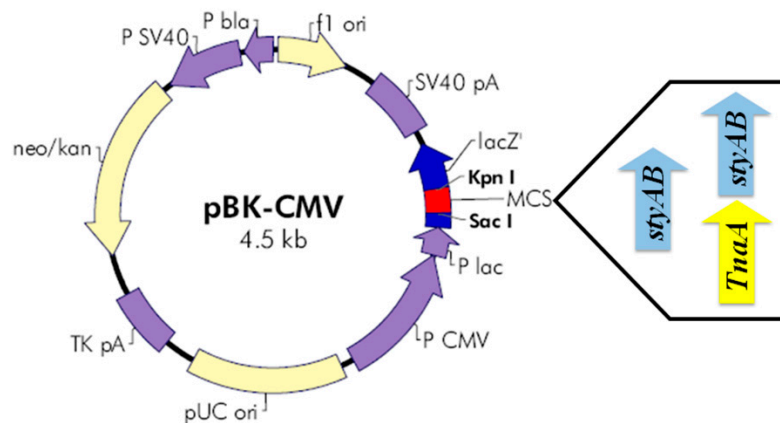

**Figure S1.** Construction of the expression vector pBK-AB harboring *styAB* and pBK-ABT harboring *TnaA* and *styAB*. MCS, multiple cloning site; Plac, lac promoter; PCMV, CMV promoter; pUC ori, pUC origin; neo/kan, neomycin/kanamycin resistance ORF.
